# Supplementary material for: Transcriptional Dynamics and Candidate Genes Involved in Pod Maturation of Common Bean (Phaseolus vulgaris L.)
Source: MDPI journal article supplement (doi:10.3390/plants9040545), 2020-04-22
Supplement: s1 [file s1]

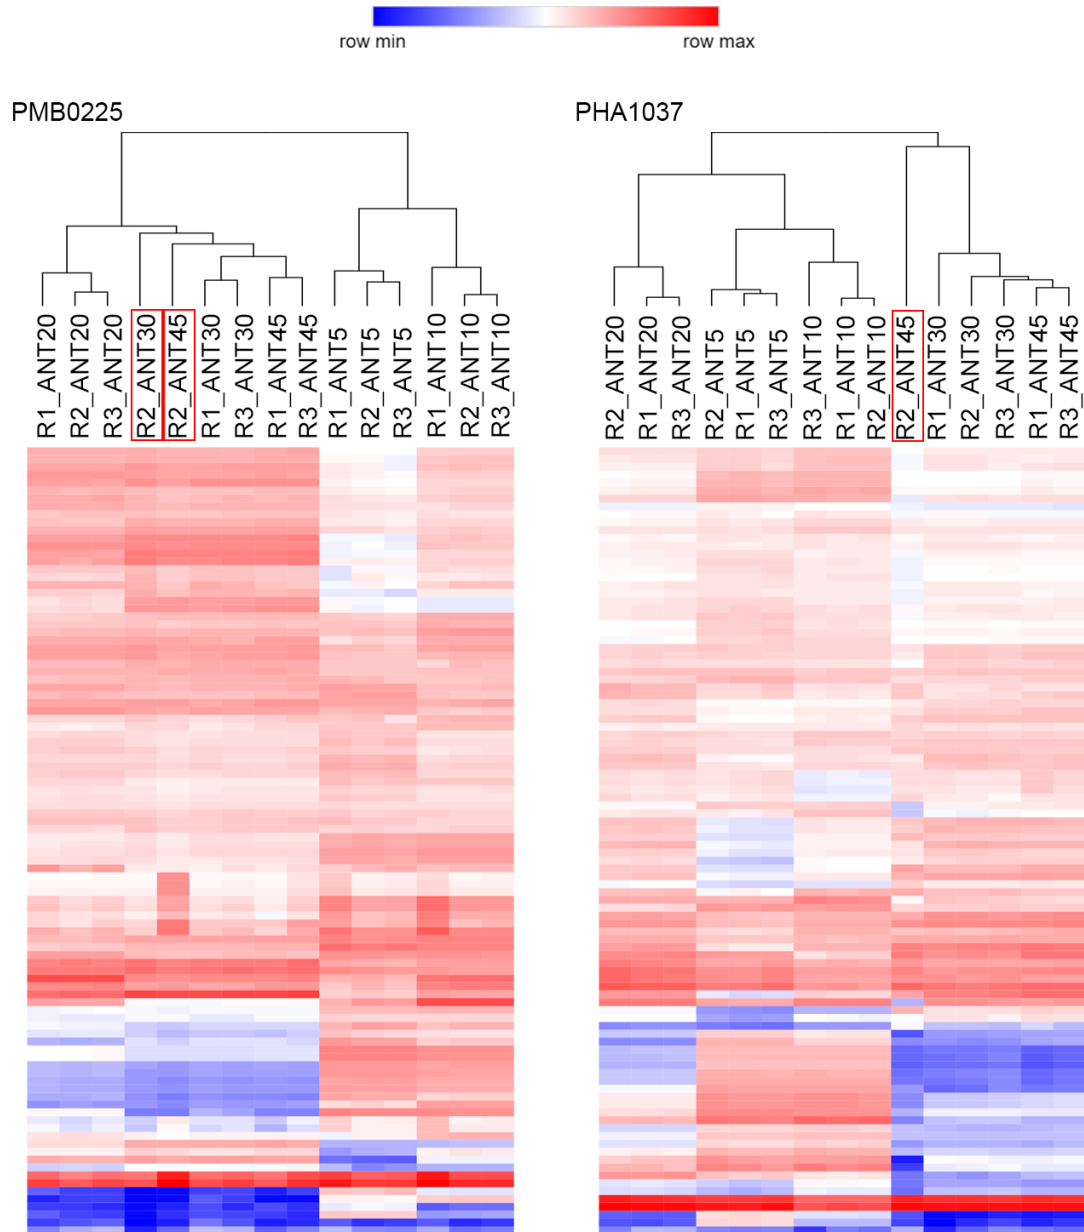

**Figure S1.** Hierarchical clustering of the common top-ranked 100 expressed genes, which was obtained from all replicates and samples in both PMB0225 and PHA1037 cultivars. The *heatmap.2* and *hclust* functions (distance method = 'maximum' and cluster method = 'average') from the *gplots* R package (<https://cran.r-project.org/package=gplots>) were used for clustering analysis based on  $\log(\text{FPKM}+1)$  values. The replicates framed in red showed a clustering behavior discordant to the other two replicates for the same developmental stage, and therefore they were discarded for further analyses.
